# Supplementary figures and images for: Personal Accounts: Stepping Into a Crosswalk
Source: Atypon-hosted journal article supplement (doi:10.1176/appi.ps.20120p734), 2012-08-01

AYER'S HAIR VIGOR  
FOR THE TOILET

*Restores Gray Hair to its Natural Vitality and Color.*

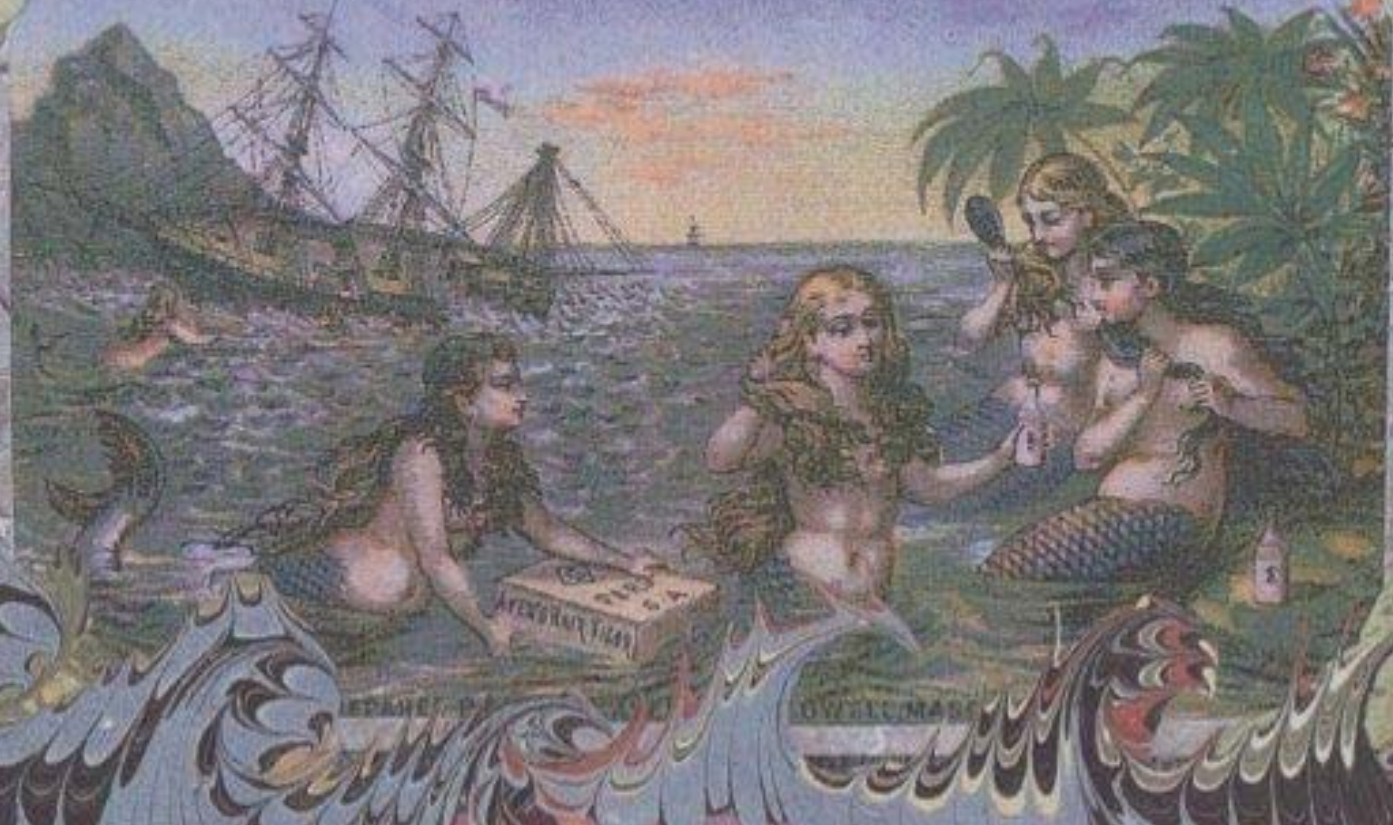

Supplement: pss6308_0734_ds.pdf [file pss6308_0734_ds.pdf]
